# Supplementary material for: A Null B-Ring Improves the Antioxidant Levels of Flavonol: A Comparative Study between Galangin and 3,5,7-Trihydroxychromone
Source: MDPI journal article supplement (doi:10.3390/molecules23123083), 2018-11-26
Supplement: s1 [file s1]

# Null B-ring Improves the Antioxidant Levels of Flavonol: A Comparative Study between Galangin and 3,5,7-Trihydroxychromone

Xiaojian Ouyang <sup>1,2,†</sup>, Xican Li<sup>1,2,†,\*</sup>, Wenbiao Lu<sup>1,2</sup>, Xiaojun Zhao<sup>1,2</sup>, and Dongfeng Chen <sup>3,4,\*</sup>

<sup>1</sup> School of Chinese Herbal Medicine; Guangzhou University of Chinese Medicine, Guangzhou 510006, China. E-mails: 931504113@qq.com (X.O.);

<sup>2</sup> Innovative Research & Development Laboratory of TCM; Guangzhou University of Chinese Medicine, Guangzhou 510006, China.

<sup>3</sup> School of Basic Medical Science, Guangzhou University of Chinese Medicine, Guangzhou, China, 510006

<sup>4</sup> The Research Center of Basic Integrative Medicine, Guangzhou University of Chinese Medicine, Guangzhou, China, 510006. E-mail: chen888@gzucm.edu.cn (D.C.)

\* Correspondence: lixc@gzucm.edu.cn (X.L.); lixican@126.com (X.L.); chen888@gzucm.edu.cn (D.C.)  
Tel: +86-20-39358076; Fax: +86-20-38892690

<sup>†</sup> These authors contributed equally to this work.

**Note:** This Supporting Information file provides the original data of Table 1 in the main text. All underlined data are mentioned in Table 1 in the main text.

## Superoxide anion ( $\bullet\text{O}_2^-$ ) scavenging assay

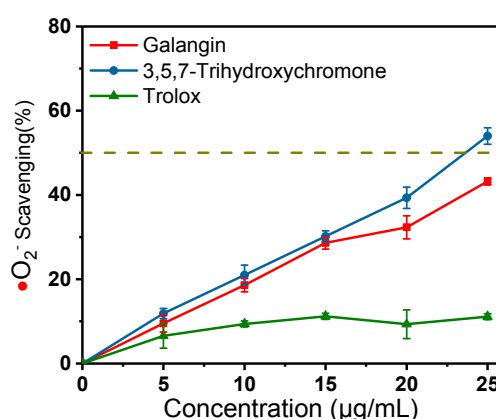

**Figure S1:** The dose response curves of galangin and 3,5,7-trihydroxychromone in  $\bullet\text{O}_2^-$ -inhibition assay. Each value is expressed as mean  $\pm$  SD (n = 3).

**Table S1.** The comparison of  $\text{IC}_{50}$  values of galangin and 3,5,7-trihydroxychromone and positive control in  $\bullet\text{O}_2^-$  scavenging assay.

|                          | Mean $\pm$ SD<br>$\mu\text{g/mL}$ | Mean $\pm$ SD<br>$\mu\text{M}$               |
|--------------------------|-----------------------------------|----------------------------------------------|
| Galangin                 | 29.4 $\pm$ 1.2                    | <u>108.7<math>\pm</math>4.4</u> <sup>a</sup> |
| 3,5,7-Trihydroxychromone | 24.4 $\pm$ 0.9                    | <u>125.4<math>\pm</math>4.9</u> <sup>b</sup> |
| Trolox                   | 1243.6 $\pm$ 39.5                 | <u>4968.4<math>\pm</math>157.9</u>           |

$\text{IC}_{50}$  value was defined as the concentration of 50% superoxide anion radical inhibition and calculated by linear regression which was analyzed by Origin 6.0 professional software. Means values with different superscripts in the same column are significantly different (p<0.05).

### DPPH•-scavenging assay

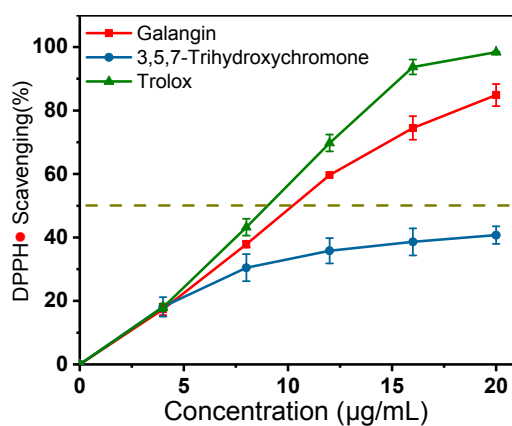

**Figure S2:** The dose response curves of galangin and 3,5,7-trihydroxychromone in DPPH•-scavenging assay. Each value is expressed as mean  $\pm$  SD (n = 3).

**Table S2.** The comparison of IC<sub>50</sub> values of galangin and 3,5,7-trihydroxychromone and positive control in DPPH•-scavenging assay.

|                          | Mean $\pm$ SD<br>$\mu$ g/mL | Mean $\pm$ SD<br>$\mu$ M                     |
|--------------------------|-----------------------------|----------------------------------------------|
| Galangin                 | 2.7 $\pm$ 0.1               | <u>10.2<math>\pm</math>0.3<sup>a</sup></u>   |
| 3,5,7-Trihydroxychromone | 26.0 $\pm$ 4.2              | <u>134.1<math>\pm</math>21.4<sup>b</sup></u> |
| Trolox                   | 9.2 $\pm$ 0.3               | <u>36.9<math>\pm</math>1.0</u>               |

IC<sub>50</sub> value was defined as the concentration of 50% superoxide anion radical inhibition and calculated by linear regression which was analyzed by Origin 6.0 professional software. Means values with different superscripts in the same column are significantly different (p<0.05).

### PTIO•-scavenging assay

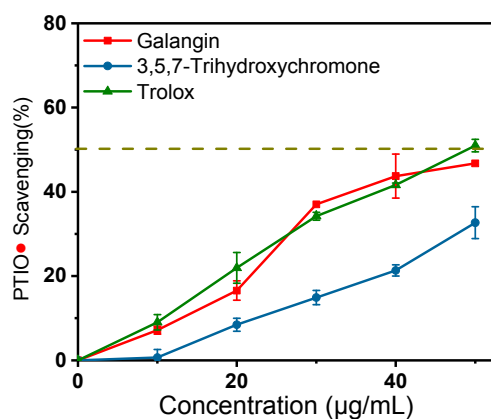

**Figure S3:** The dose response curves of galangin and 3,5,7-trihydroxychromone in PTIO•-scavenging assay. Each value is expressed as mean  $\pm$  SD (n = 3).

**Table S3:** The comparison of IC<sub>50</sub> values of galangin and 3,5,7-trihydroxychromone and positive control in PTIO•-scavenging assay.

|                          | Mean±SD<br>μg/mL | Mean±SD<br>μM                 |
|--------------------------|------------------|-------------------------------|
| Galangin                 | 2.7±0.1          | <u>176.7±24.3<sup>a</sup></u> |
| 3,5,7-Trihydroxychromone | 26.0±4.2         | <u>395.1±33.3<sup>b</sup></u> |
| Trolox                   | 9.2±0.3          | <u>186.3±7.2</u>              |

IC<sub>50</sub> value was defined as the concentration of 50% superoxide anion radical inhibition and calculated by linear regression which was analyzed by Origin 6.0 professional software. Means values with different superscripts in the same column are significantly different (p<0.05).

*Fe<sup>3+</sup>-reducing power assay*

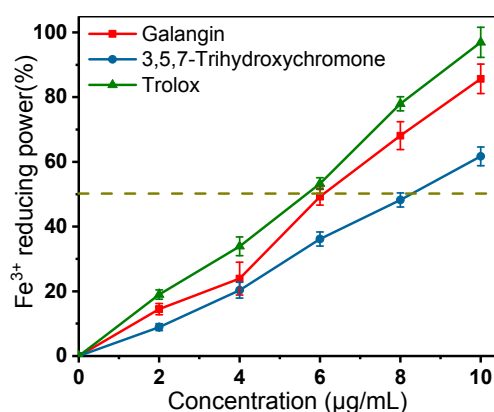

**Figure S4:** The dose response curves of galangin and 3,5,7-trihydroxychromone in Fe<sup>3+</sup>-reducing power assay. Each value is expressed as mean ± SD (n = 3).

**Table S4:** The comparison of IC<sub>50</sub> values of galangin and 3,5,7-trihydroxychromone and positive control in Fe<sup>3+</sup>-reducing power assay.

|                          | Mean±SD<br>μg/mL | Mean±SD<br>μM               |
|--------------------------|------------------|-----------------------------|
| Galangin                 | 6.2±0.4          | <u>22.9±1.3<sup>a</sup></u> |
| 3,5,7-Trihydroxychromone | 8.3±0.3          | <u>42.5±1.6<sup>b</sup></u> |
| Trolox                   | 5.4±0.2          | <u>21.5±0.8</u>             |

IC<sub>50</sub> value was defined as the concentration of 50% superoxide anion radical inhibition and calculated by linear regression which was analyzed by Origin 6.0 professional software. Means values with different superscripts in the same column are significantly different (p<0.05).

# ABTS<sup>+</sup>•-scavenging assay

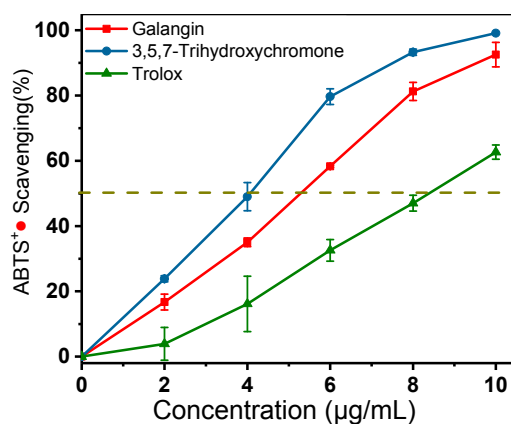

**Figure S5:** The dose response curves of galangin and 3,5,7-trihydroxychromone in ABTS<sup>+</sup>•-scavenging assay. Each value is expressed as mean  $\pm$  SD (n = 3).

**Table S5:** The comparison of IC<sub>50</sub> values of galangin and 3,5,7-trihydroxychromone and positive control in ABTS<sup>+</sup>•-scavenging assay.

|                          | Mean $\pm$ SD<br>$\mu$ g/mL | Mean $\pm$ SD<br>$\mu$ M    |
|--------------------------|-----------------------------|-----------------------------|
| Galangin                 | 5.3 $\pm$ 0.1               | 19.7 $\pm$ 0.1 <sup>a</sup> |
| 3,5,7-Trihydroxychromone | 4.1 $\pm$ 0.1               | 20.9 $\pm$ 0.3 <sup>a</sup> |
| Trolox                   | 10.8 $\pm$ 0.4              | 43.3 $\pm$ 1.7              |

IC<sub>50</sub> value was defined as the concentration of 50% superoxide anion radical inhibition and calculated by linear regression which was analyzed by Origin 6.0 professional software. Means values with different superscripts in the same column are significantly different (p<0.05).
