# Supplementary material for: A Null B-Ring Improves the Antioxidant Levels of Flavonol: A Comparative Study between Galangin and 3,5,7-Trihydroxychromone
Source: MDPI journal article supplement (doi:10.3390/molecules23123083), 2018-11-26
Supplement: s1 [file s1]

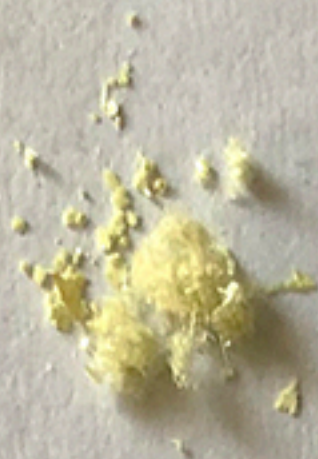

**Galangin**

## CERTIFICATE OF ANALYSIS

**BBP No.:** BBP00304

**CAS No.:** 548-83-4

**Chemical Name:** Galangin

**Molecular Formula:** C<sub>15</sub>H<sub>10</sub>O<sub>5</sub>

**Structure:**

**Purity:** 98%

**Appearance:** Yellow powder

**Solvent:** Dimethyl sulfoxide, methanol

**Exact Weight:** 10.1 mg

**Storage:** Store in a dark place under the temperature of 0-4 °C

**Intended Use:** For laboratory use only

**Reference:** V. A. Facundo, et al., Biochem. System. Ecol., 2003, 31, 111-113

**Warm Notice:** When publishing, please cite as: chemical name was purchased from BioBioPha Co., Ltd. (Kunming, China)

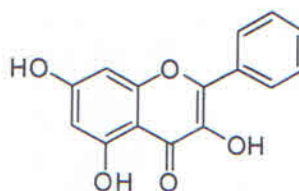

### Characterization Data Summary

| Analytical Test                           | Results                             |
|-------------------------------------------|-------------------------------------|
| Identification by <sup>1</sup> H-NMR      | Consistent with the above structure |
| Purity tested by HPLC, <sup>1</sup> H-NMR | 98%                                 |

**Authorized Signature:**

**Date:**

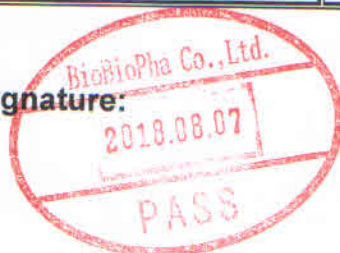

## PRODUCT QUALITY REPORT

Product Number: BBP00304

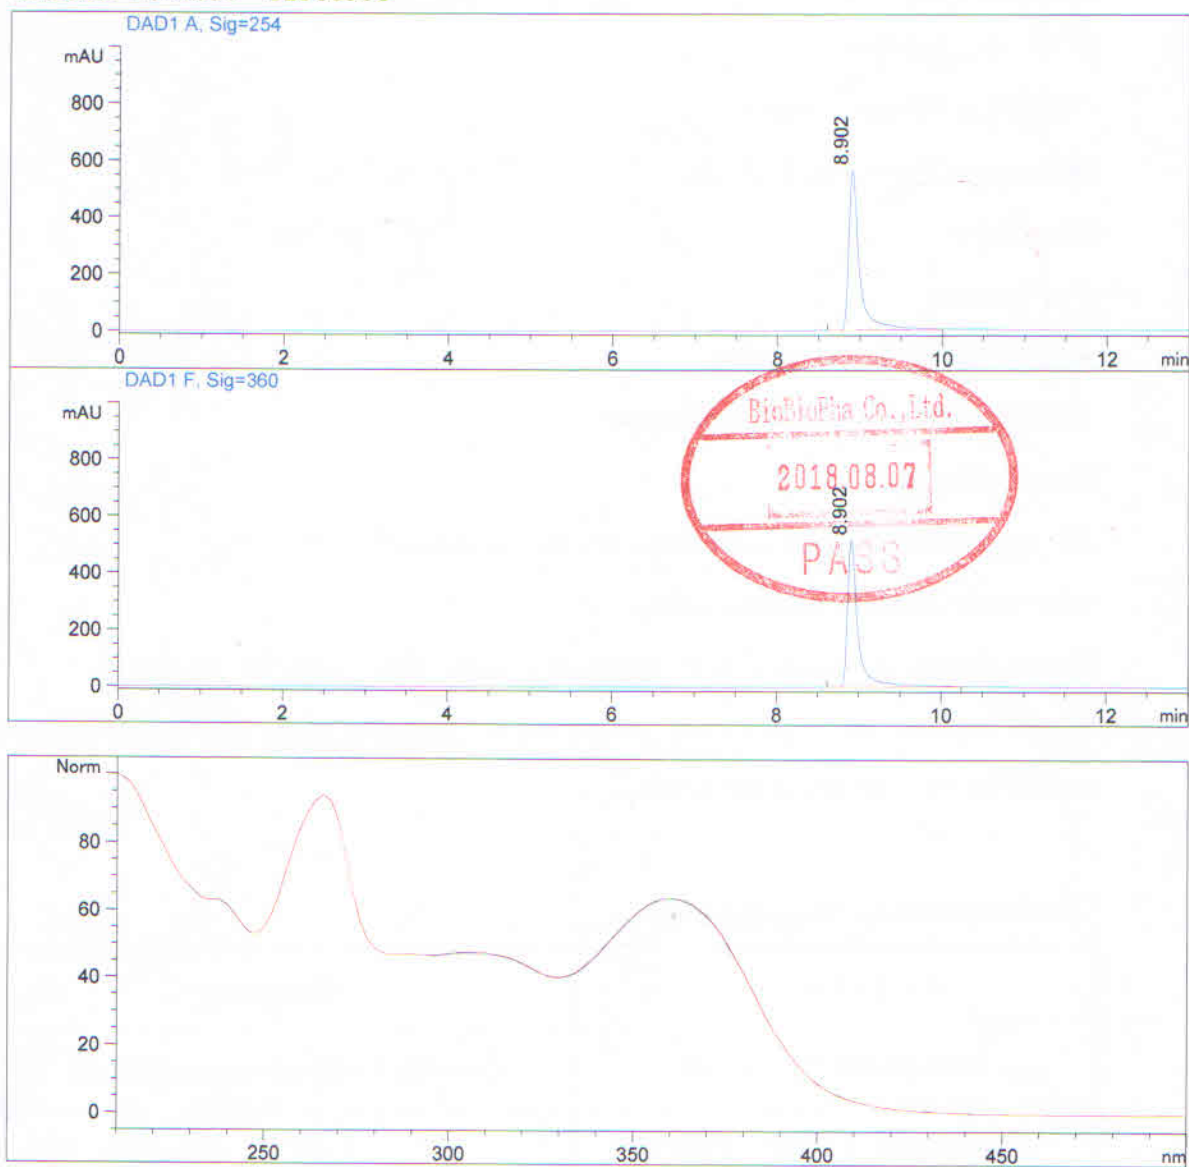

Agilent 1200 series HPLC system

Thermo Hypersil BDS C18 column (5  $\mu$ m, 4.6  $\times$  150 mm)

20%  $\rightarrow$  100% MeOH in H<sub>2</sub>O over 8.0 min followed by 100% MeOH to 13.0 min

1.0 ml/min, 20°C

DMSO- $d_6$ , 500 MHz

12.356  
10.870  
9.676  
8.153  
8.150  
8.135  
7.559  
7.544  
7.541  
7.529  
7.502  
7.488  
6.462  
6.458  
6.206  
6.202  
2.490

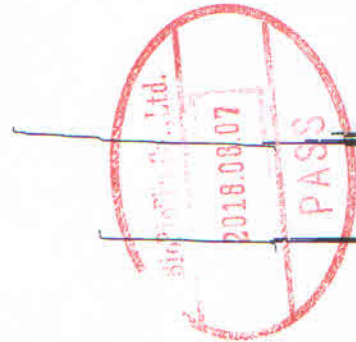

1.01  
0.81  
0.83  
2.02  
3.00  
1.00  
1.00

12.5 12.0 11.5 11.0 10.5 10.0 9.5 9.0 8.5 8.0 7.5 7.0 6.5 6.0 5.5 5.0 4.5 4.0 3.5 3.0 2.5 2.0 1.5 1.0 0.5

$\delta$  (ppm)
