# Supplementary material for: A Null B-Ring Improves the Antioxidant Levels of Flavonol: A Comparative Study between Galangin and 3,5,7-Trihydroxychromone
Source: MDPI journal article supplement (doi:10.3390/molecules23123083), 2018-11-26

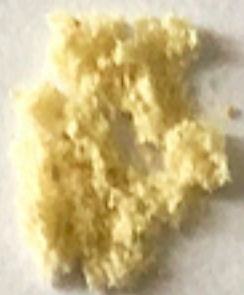

**3,5,7-Trihydroxychromone**

## CERTIFICATE OF ANALYSIS

**BBP No.:** BBP04598

**CAS No.:** 31721-95-6

**Chemical Name:** 3,5,7-Trihydroxychromone

**Molecular Formula:** C<sub>9</sub>H<sub>6</sub>O<sub>5</sub>

**Structure:**

**Purity:** 98%

**Appearance:** Yellow powder

**Solvent:** Methanol, acetone

**Exact Weight:** 5.1 mg

**Storage:** Store in a dark place under the temperature of 0-4 °C

**Intended Use:** For laboratory use only

**Reference:** G. X. Yang, Chin Pharm J, 2003, 38(5), 338-340

**Warm Notice:** When publishing, please cite as: chemical name was purchased from BioBioPha Co., Ltd. (Kunming, China)

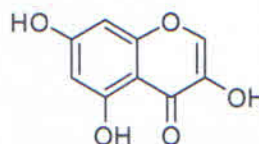

### Characterization Data Summary

| Analytical Test                           | Results                             |
|-------------------------------------------|-------------------------------------|
| Identification by <sup>1</sup> H-NMR      | Consistent with the above structure |
| Purity tested by HPLC, <sup>1</sup> H-NMR | 98%                                 |

**Authorized Signature:**

**Date:**

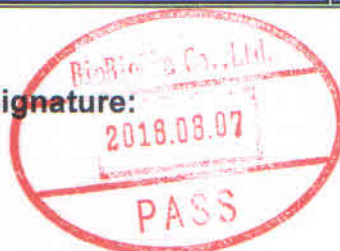

## PRODUCT QUALITY REPORT

Product Number: BBP04598

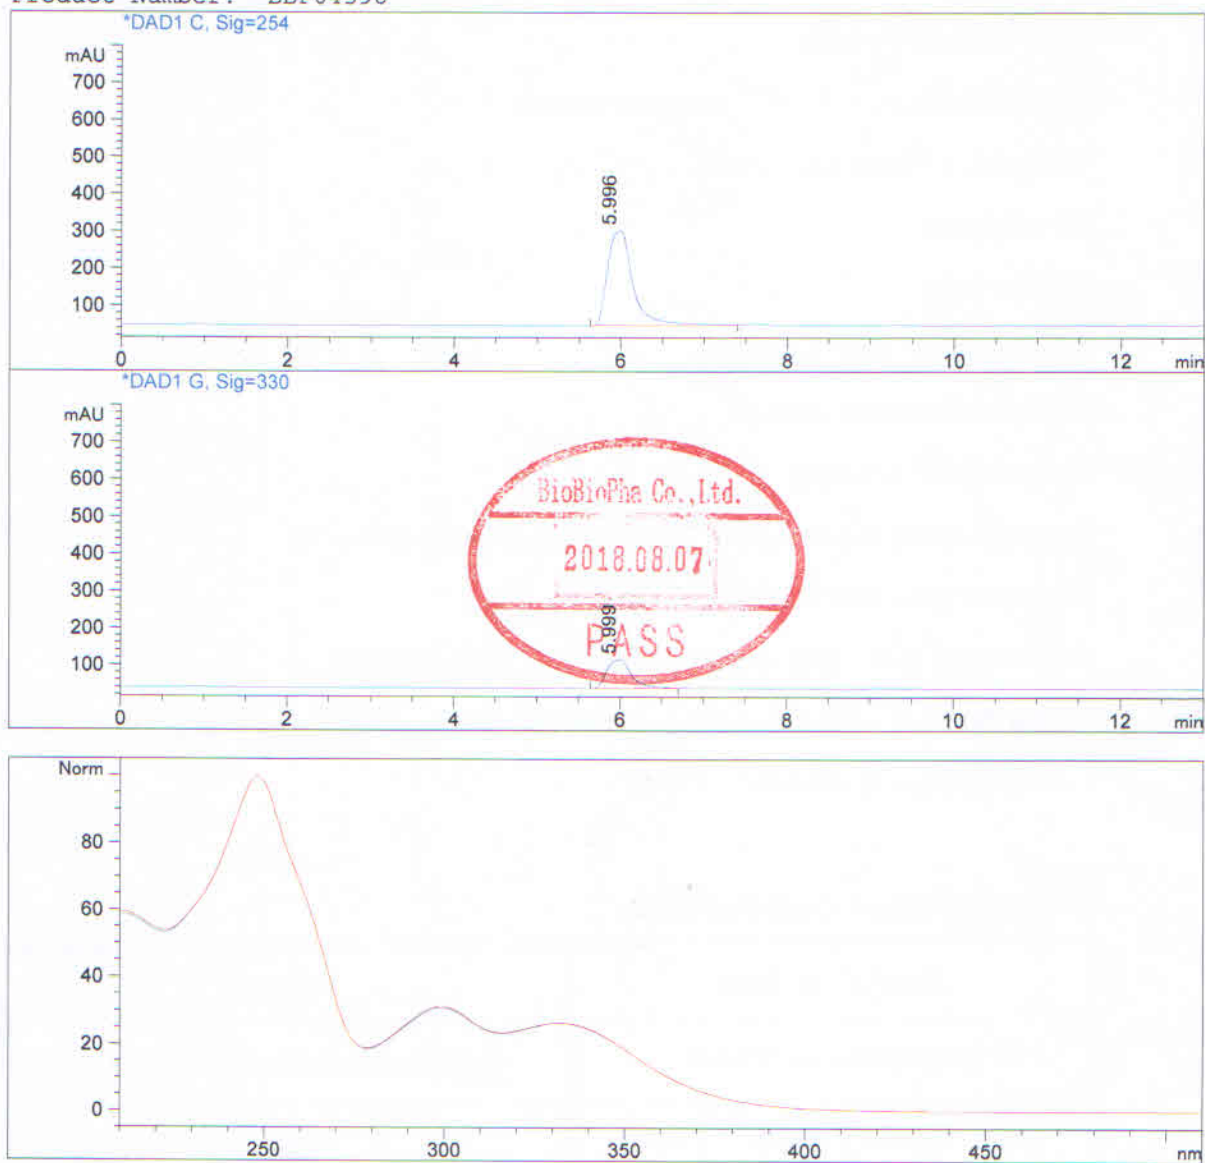

Agilent 1200 series HPLC system

Thermo Hypersil BDS C18 column (5  $\mu$ m, 4.6  $\times$  150 mm)

20%  $\rightarrow$  100% MeOH in H<sub>2</sub>O over 8.0 min followed by 100% MeOH to 13.0 min

1.0 ml/min, 20°C

CD<sub>3</sub>OD, 500 MHz

—7.864

6.280  
6.276  
6.170  
6.166

—3.300

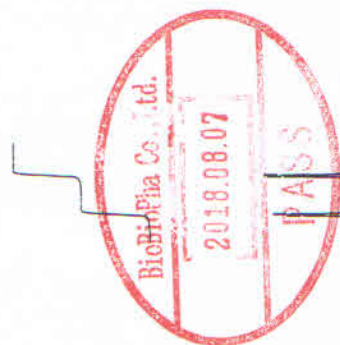

西力生物  
BBP BioBioPha  
BBP04598

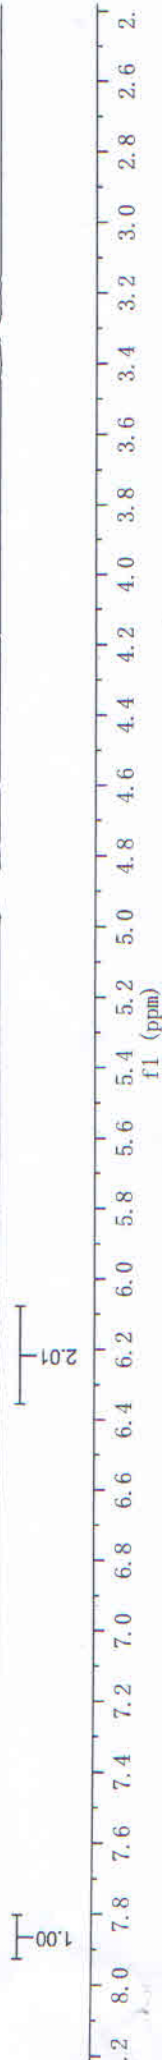

Supplement: s1 [file s1]
